# Supplementary material
Source: Research Square preprint supplement (doi:10.21203/rs.3.rs-9683416/v1)
Supplement: Supplementary file 1 [file 0a4d70508255581f354a6348.docx]

**Supplementary information**

**Additional file 1: Table S1.** Raw mortality data from insecticide susceptibility tests of *Anopheles gambiae* s.l*.* populations across four localities in Burkina Faso **Additional file 2: Table S2.** Raw mortality data from insecticide susceptibility tests of *Anopheles coluzzii* collected in the Vallée du Kou over five consecutive years **Additional file 3: Table S3.** Raw mortality data from insecticide susceptibility tests across six generations of a laboratory colony of *Anopheles coluzzii* **Additional file 4: Table S4.** Raw L995F genotyping data in *Anopheles coluzzii* across four localities in Burkina Faso**Additional file 5: Table S5.** Raw L995F genotyping data in *Anopheles coluzzii* from the Vallée du Kou over five consecutive years**Additional file 6: Table S6.** Raw L995F genotyping data from six generations of a laboratory colony of *Anopheles coluzzii*
