# Supplementary material
Source: Research Square preprint supplement (doi:10.21203/rs.3.rs-9683416/v1)
Supplement: Supplementary file 2 [file 0f14b2ae049b3cb81aae1402.xlsx]

## Sheet: Feuil1
Table S6. Raw L995F genotyping data from six generations of a laboratory colony of Anopheles coluzzii
Generation F5		Generation F9		Generation F14		Generation F18		Generation F23		Generation F27
ID	Genotype	ID	Genotype	ID	Genotype	ID	Genotype	ID	Genotype	ID	Genotype
1	RR	1	RS	1	RR	1	SS	1	RS	1	RS
2	RR	2	RR	2	RS	2	SS	2	RS	2	SS
3	RS	3	RS	3	RS	3	RS	3	RS	3	SS
4	RR	4	RS	4	RR	4	RS	4	SS	4	RS
5	RS	5	RR	5	RS	5	SS	5	RR	5	RS
6	RR	6	RS	6	RR	6	RS	6	SS	6	RS
7	RS	7	RR	7	RS	7	RS	7	SS	7	SS
8	RR	8	SS	8	RR	8	RS	8	RS	8	SS
9	RR	9	RR	9	RS	9	RS	9	SS	9	RS
10	RR	10	SS	10	RS	10	SS	10	SS	10	RS
11	RS	11	RS	11	RR	11	RS	11	RS	11	RS
12	RR	12	SS	12	RS	12	SS	12	SS	12	RR
13	RS	13	RS	13	SS	13	RS	13	SS	13	SS
14	RR	14	RS	14	RR	14	SS	14	RS	14	SS
15	RR	15	RS	15	RR	15	RS	15	RR	15	SS
16	RS	16	RS	16	RS	16	RS	16	RR	16	RS
17	SS	17	RS	17	SS	17	RS	17	SS	17	RS
18	RR	18	RS	18	SS	18	SS	18	RS	18	RS
19	RS	19	RS	19	SS	19	RS	19	RS	19	SS
20	RS	20	RS	20	SS	20	RS	20	SS	20	SS
21	RS	21	SS	21	RS	21	SS	21	RS	21	SS
22	RS	22	RS	22	RS	22	RS	22	SS	22	SS
23	RR	23	RR	23	RS	23	RS	23	RS	23	SS
24	RS	24	RS	24	RS	24	RS	24	RS	24	SS
25	RR	25	RR	25	SS	25	RS	25	RR	25	SS
26	SS	26	RR	26	SS	26	RS	26	SS	26	SS
27	RS	27	RR	27	RS	27	RS	27	SS	27	SS
28	RR	28	RR	28	RS	28	RS	28	RS	28	SS
29	RS	29	RR	29	RS	29	RS	29	RS	29	RS
30	RS	30	RR	30	SS	30	RS	30	RS	30	SS
31	RR	31	RR	31	RR	31	RS	31	SS	31	RS
32	RS	32	RR	32	RS	32	RS	32	RS	32	SS
33	RR	33	RS	33	RS	33	RS	33	RS	33	SS
34	RS	34	RS	34	RS	34	RS	34	RR	34	SS
35	RR	35	RS	35	RS	35	SS	35	SS	35	SS
36	RR	36	RR	36	RS	36	RS	36	SS	36	RR
37	RR	37	RR	37	SS	37	RS	37	RR	37	SS
38	RR	38	SS	38	SS	38	RS	38	SS	38	SS
39	RS	39	RR	39	RS	39	RS	39	SS	39	SS
40	RS	40	RS	40	RR	40	SS	40	RR	40	SS
41	RR	41	RR	41	RS	41	RS	41	SS	41	SS
42	RR	42	RR	42	RR	42	SS	42	SS	42	SS
43	RR	43	RS	43	RS	43	RS	43	SS	43	RS
44	RR	44	RS	44	RR	44	RS	44	RS	44	RS
45	RR	45	RS	45	SS	45	SS	45	RS	45	SS
46	RS	46	SS	46	RR	46	RS	46	RS	46	SS
47	RR	47	RR	47	RR	47	RS	47	RS	47	RS
48	RS	48	RR	48	RS	48	RS	48	RS	48	SS
49	RR	49	SS	49	RS	49	RS	49	RS	49	SS
50	RR	50	RR	50	SS	50	RS	50	RS	50	RS
51	RR	51	SS	51	RR	51	RS	51	RS	51	SS
52	RR	52	RR	52	SS	52	RS	52	SS	52	SS
53	RR	53	RR	53	RS	53	RS	53	SS	53	SS
54	RS	54	RR	54	RS	54	RS	54	RS	54	RS
55	RR	55	RS	55	RS	55	RS	55	RR	55	RS
56	RS	56	RS	56	SS	56	RS	56	RS	56	RS
57	RR	57	RS	57	RR	57	RS	57	SS	57	SS
58	RR	58	RS	58	SS	58	RS	58	SS	58	SS
59	RR	59	RR	59	SS	59	RR	59	RS	59	SS
60	RS	60	RS	60	RS	60	RS	60	RS	60	SS
61	RS	61	RR	61	RR	61	RS	61	RS	61	SS
62	RR	62	RS	62	RR	62	RS	62	RS	62	SS
63	RS	63	RS	63	RR	63	RS	63	RS	63	SS
64	SS	64	RS	64	SS	64	RS	64	SS	64	RS
65	RS	65	RS	65	RS	65	RS	65	RS	65	SS
66	RR	66	RS	66	RS	66	RS	66	SS	66	RR
67	RS	67	RS	67	RR	67	RS	67	SS	67	RS
68	RR	68	RS	68	SS	68	RS	68	RS	68	SS
69	RR	69	RS	69	SS	69	SS	69	SS	69	RS
70	RS	70	RS	70	RS	70	SS	70	RS	70	RS
71	RS	71	RS	71	RS	71	RR	71	SS	71	RS
72	SS	72	RS	72	RR	72	RS	72	RS	72	RS
73	RR	73	RS	73	SS	73	SS	73	RS	73	SS
74	RS	74	RS	74	RR	74	SS	74	RR	74	SS
75	RS	75	RS	75	RR	75	RS	75	RS	75	RS
76	RS	76	RS	76	RR	76	SS	76	SS	76	SS
77	RR	77	SS	77	RR	77	SS	77	SS	77	SS
78	RR	78	SS	78	RR	78	RR	78	SS	78	RS
79	RR	79	RS	79	SS	79	RS	79	SS	79	RS
80	RS	80	RS	80	RS	80	RS	80	RS	80	SS
81	RR	81	RS	81	SS	81	RS	81	SS	81	RS
82	RS	82	RR	82	SS	82	RR	82	RS	82	SS
83	RR	83	RR	83	RR	83	RR	83	RS	83	RS
84	RS	84	RS	84	RS	84	SS	84	SS	84	SS
85	RS	85	RR	85	RR	85	RS	85	SS	85	RS
86	RR	86	RR	86	RS	86	RS	86	RR	86	SS
87	RS	87	RR	87	RS	87	RS	87	RS	87	RS
88	RR	88	RS	88	RS	88	RS	88	RR	88	SS
89	RR	89	RS	89	RR			89	RR	89	SS
90	RS	90	RS	90	RS			90	SS	90	RS
91	RS	91	SS	91	RS			91	SS	91	SS
92	RS	92	RS	92	RS			92	SS	92	RS
93	RS	93	RS	93	SS			93	SS	93	SS
94	RS	94	RR							94	SS
95	RR	95	SS							95	SS
96	RR	96	RR							96	SS
97	RS	97	RR
		98	RS
Legend: S = susceptible allele L995S, R = resistant allele L995F
