# Supplementary material
Source: Research Square preprint supplement (doi:10.21203/rs.3.rs-9683416/v1)
Supplement: Supplementary file 3 [file 161123c313997bf4b111c199.xlsx]

## Sheet: Feuil1
Table S5. Raw L995F genotyping data in Anopheles coluzzii from the Vallée du Kou over five consecutive years
Year 2021		Year 2022		Year 2023		Year 2024		Year 2025
ID	Genotype	ID	Genotype	ID	Genotype	ID	Genotype	ID	Genotype
1	SS	1	SS	1	RR	1	SS	1	RS
2	RS	2	SS	2	SS	2	RS	2	RS
3	RR	3	SS	3	RR	3	SS	3	SS
4	RS	4	RS	4	RS	4	RS	4	RS
5	SS	5	RR	5	RS	5	RS	5	RS
6	RS	6	RS	6	SS	6	RS	6	RS
7	RR	7	RR	7	RS	7	SS	7	SS
8	RS	8	SS	8	RS	8	SS	8	RS
9	SS	9	RS	9	RS	9	SS	9	RS
10	RS	10	RS	10	RS	10	SS	10	RS
11	RR	11	RS	11	RS	11	SS	11	RS
12	RS	12	RS	12	SS	12	RS	12	SS
13	RS	13	RS	13	RR	13	SS	13	RS
14	SS	14	RS	14	RR	14	RS	14	RS
15	RR	15	SS	15	RS	15	RR	15	RS
16	RS	16	RS	16	RS	16	RR	16	SS
17	SS	17	RR	17	RS	17	RR	17	RS
18	RS	18	RR	18	RS	18	RS	18	RS
19	RR	19	SS	19	RR	19	RS	19	RS
20	RS	20	SS	20	SS	20	RS	20	RR
21	SS	21	SS	21	RS	21	SS	21	SS
22	RS	22	RR	22	SS	22	RS	22	RS
23	RR	23	RS	23	SS	23	SS	23	SS
24	RS	24	SS	24	SS	24	RR	24	RS
25	RS	25	SS	25	SS	25	SS	25	SS
26	SS	26	SS	26	SS	26	SS	26	RS
27	RR	27	RR	27	SS	27	SS	27	RS
28	RS	28	RR	28	RS	28	SS	28	RS
29	SS	29	RS	29	RS	29	SS	29	SS
30	RS	30	RS	30	RR	30	SS	30	SS
31	RR	31	RR	31	SS	31	RR	31	SS
32	RS	32	RS	32	RR	32	RS	32	SS
33	SS	33	RS	33	SS	33	SS	33	SS
34	RS	34	SS	34	SS	34	SS	34	SS
35	RR	35	RS	35	SS	35	SS	35	SS
36	RS	36	SS	36	SS	36	SS	36	SS
37	RS	37	SS	37	RR	37	SS	37	RS
38	SS	38	RR	38	RS	38	SS	38	RR
39	RR	39	RS	39	RR	39	SS	39	SS
40	RS	40	RS	40	SS	40	SS	40	RS
41	SS	41	RS	41	RS	41	SS	41	RR
42	RS	42	RS	42	SS	42	SS	42	RS
43	RR	43	RS	43	RS	43	SS	43	SS
44	RS	44	SS	44	SS	44	SS	44	RS
45	SS	45	RS	45	SS	45	RR	45	RS
46	RS	46	RR	46	RS	46	SS	46	RS
47	RR	47	SS	47	RS	47	SS	47	SS
48	RS	48	RS	48	RR	48	SS	48	SS
49	RS	49	RS	49	RS	49	RS	49	SS
50	SS	50	RR	50	SS	50	RS	50	RR
51	RR	51	RR	51	RS	51	RS	51	SS
52	RS	52	RR	52	SS	52	RR	52	RR
53	SS	53	RS	53	SS	53	SS	53	SS
54	RS	54	SS	54	SS	54	SS	54	SS
55	RR	55	RS	55	SS	55	SS	55	RR
56	RS	56	RR	56	SS	56	SS	56	SS
57	SS	57	RS	57	SS	57	RS	57	RS
58	RS	58	RS	58	RS	58	RS	58	RS
59	RR	59	RS	59	RS	59	SS	59	RR
60	RS	60	RS	60	RS	60	SS	60	RR
61	RS	61	SS	61	RS	61	SS	61	SS
62	SS	62	SS	62	RS	62	SS	62	RS
63	RR	63	RR	63	RS	63	SS	63	SS
64	RS	64	RS	64	RS	64	SS	64	SS
65	SS	65	RR	65	SS	65	SS	65	SS
66	RS	66	RR	66	RS	66	SS	66	RS
67	RR	67	RR	67	RR	67	SS	67	RS
68	RS	68	SS	68	RS	68	RS	68	SS
69	SS	69	RS	69	RR	69	RS	69	RR
70	RS	70	RR	70	RS	70	RS	70	RS
71	RR	71	RS	71	SS	71	SS	71	RR
72	RS	72	RS	72	SS	72	SS	72	SS
73	RS	73	RR	73	RS	73	RS	73	SS
74	SS	74	RS	74	SS	74	RS	74	SS
75	RR	75	RR	75	RS	75	RS	75	SS
76	RS	76	RR	76	RR	76	SS	76	SS
77	SS	77	RR	77	SS	77	RS	77	SS
78	RS	78	RS	78	RS	78	RR	78	SS
79	RR	79	RR	79	SS	79	RR	79	RR
80	RS	80	RS	80	SS	80	SS	80	RS
81	SS	81	RR	81	RS	81	RS	81	RS
82	RS	82	RS	82	RR	82	RS	82	RS
83	RR	83	RR	83	SS	83	RR	83	SS
84	RS	84	RS	84	SS	84	SS	84	SS
85	RS	85	RR	85	SS	85	RR	85	SS
86	SS	86	RR	86	SS	86	RR	86	RS
87	RR	87	SS	87	SS	87	RR	87	RS
88	RS	88	SS	88	SS	88	RR	88	RS
89	SS	89	RS	89	SS	89	SS	89	SS
90	RS	90	RS	90	SS	90	SS	90	SS
91	RR	91	RS	91	RR	91	RS	91	RS
92	RS			92	SS	92	RS	92	RS
				93	SS	93	RS	93	SS
				94	SS	94	RS	94	SS
				95	RR	95	RR	95	SS
						96	RS	96	SS
						97	SS	97	SS
						98	SS	98	RS
								99	RS
								100	RS
								101	RS
								102	SS
								103	SS
								104	RS
								105	RS
								106	RR
								107	SS
								108	SS
								109	RS
								110	SS
								111	SS
								112	SS
								113	SS
								114	SS
								115	SS
								116	RS
								117	RS
								118	RS
								119	RS
								120	RS
								121	RS
								122	RS
								123	RS
								124	SS
								125	RR
								126	RS
								127	RS
								128	RS
								129	SS
								130	RS
								131	RS
								132	RR
								133	SS
								134	SS
								135	RS
								136	RS
								137	RS
								138	SS
								139	RS
								140	SS
								141	SS
								142	SS
								143	RS
								144	SS
								145	SS
								146	SS
								147	SS
								148	RS
								149	SS
								150	RS
								151	SS
								152	RS
								153	RS
								154	RS
								155	RS
								156	SS
								157	RS
								158	SS
								159	SS
								160	SS
								161	SS
								162	SS
								163	RS
								164	RR
Legend: S = susceptible allele L995S, R = resistant allele L995F
