# Supplementary material
Source: Research Square preprint supplement (doi:10.21203/rs.3.rs-9683416/v1)
Supplement: Supplementary file 4 [file 18a478ff8062ae1691921dcf.xlsx]

## Sheet: Feuil1
Table S1. Raw mortality data from insecticide susceptibility tests of Anopheles gambiae s.l. populations across four localities in Burkina Faso
Locality	Treatment	Total	Mortality 24h
Bama	Control	26	0
Bama	Control	25	2
Bama	Control	26	0
Bama	Control	24	0
Bama	0.05% Deltamethrin	24	1
Bama	0.05% Deltamethrin	25	0
Bama	0.05% Deltamethrin	27	0
Bama	0.05% Deltamethrin	25	0
Bama	4% PBO + 0.05% Deltamethrin	25	9
Bama	4% PBO + 0.05% Deltamethrin	26	8
Bama	4% PBO + 0.05% Deltamethrin	25	12
Bama	4% PBO + 0.05% Deltamethrin	26	7
Bama	0.75% Permethrin	24	0
Bama	0.75% Permethrin	24	0
Bama	0.75% Permethrin	24	1
Bama	0.75% Permethrin	26	1
Bama	0.1% Bendiocarb	24	23
Bama	0.1% Bendiocarb	25	24
Bama	0.1% Bendiocarb	25	24
Bama	0.1% Bendiocarb	25	23
Bama	0.25% Pirimiphos-methyl	25	25
Bama	0.25% Pirimiphos-methyl	25	25
Bama	0.25% Pirimiphos-methyl	24	24
Bama	0.25% Pirimiphos-methyl	23	23
Bama	4% DDT	26	0
Bama	4% DDT	26	1
Bama	4% DDT	26	0
Bama	4% DDT	26	0
Banfora	Control	24	0
Banfora	Control	25	0
Banfora	Control	25	0
Banfora	Control	26	0
Banfora	0.05% Deltamethrin	25	1
Banfora	0.05% Deltamethrin	24	1
Banfora	0.05% Deltamethrin	24	1
Banfora	0.05% Deltamethrin	26	1
Banfora	4% PBO + 0.05% Deltamethrin	25	16
Banfora	4% PBO + 0.05% Deltamethrin	24	10
Banfora	4% PBO + 0.05% Deltamethrin	26	12
Banfora	4% PBO + 0.05% Deltamethrin	25	12
Banfora	0.75% Permethrin	25	0
Banfora	0.75% Permethrin	26	3
Banfora	0.75% Permethrin	25	2
Banfora	0.75% Permethrin	25	1
Banfora	0.1% Bendiocarb	23	22
Banfora	0.1% Bendiocarb	26	26
Banfora	0.1% Bendiocarb	23	20
Banfora	0.1% Bendiocarb	26	26
Banfora	0.25% Pirimiphos-methyl	24	24
Banfora	0.25% Pirimiphos-methyl	26	26
Banfora	0.25% Pirimiphos-methyl	25	25
Banfora	0.25% Pirimiphos-methyl	24	24
Banfora	4% DDT	24	1
Banfora	4% DDT	24	2
Banfora	4% DDT	25	1
Banfora	4% DDT	26	1
Nanoro	Control	25	0
Nanoro	Control	25	0
Nanoro	Control	26	0
Nanoro	Control	25	1
Nanoro	0.05% Deltamethrin	23	6
Nanoro	0.05% Deltamethrin	24	5
Nanoro	0.05% Deltamethrin	22	6
Nanoro	0.05% Deltamethrin	23	7
Nanoro	4% PBO + 0.05% Deltamethrin	24	17
Nanoro	4% PBO + 0.05% Deltamethrin	26	23
Nanoro	4% PBO + 0.05% Deltamethrin	26	23
Nanoro	4% PBO + 0.05% Deltamethrin	25	18
Nanoro	0.75% Permethrin	24	0
Nanoro	0.75% Permethrin	25	0
Nanoro	0.75% Permethrin	26	1
Nanoro	0.75% Permethrin	25	0
Nanoro	0.1% Bendiocarb	24	24
Nanoro	0.1% Bendiocarb	24	22
Nanoro	0.1% Bendiocarb	23	23
Nanoro	0.1% Bendiocarb	26	25
Nanoro	0.25% Pirimiphos-methyl	26	26
Nanoro	0.25% Pirimiphos-methyl	26	26
Nanoro	0.25% Pirimiphos-methyl	25	25
Nanoro	0.25% Pirimiphos-methyl	26	26
Nanoro	4% DDT	24	7
Nanoro	4% DDT	22	12
Nanoro	4% DDT	25	5
Nanoro	4% DDT	21	2
Ziniaré	Control	26	1
Ziniaré	Control	25	0
Ziniaré	Control	26	0
Ziniaré	Control	25	0
Ziniaré	0.05% Deltamethrin	25	5
Ziniaré	0.05% Deltamethrin	26	3
Ziniaré	0.05% Deltamethrin	26	6
Ziniaré	0.05% Deltamethrin	26	5
Ziniaré	4% PBO + 0.05% Deltamethrin	24	21
Ziniaré	4% PBO + 0.05% Deltamethrin	22	16
Ziniaré	4% PBO + 0.05% Deltamethrin	24	21
Ziniaré	4% PBO + 0.05% Deltamethrin	22	9
Ziniaré	0.75% Permethrin	26	2
Ziniaré	0.75% Permethrin	25	0
Ziniaré	0.75% Permethrin	24	0
Ziniaré	0.75% Permethrin	26	4
Ziniaré	0.1% Bendiocarb	26	26
Ziniaré	0.1% Bendiocarb	25	25
Ziniaré	0.1% Bendiocarb	24	24
Ziniaré	0.1% Bendiocarb	26	26
Ziniaré	0.25% Pirimiphos-methyl	26	26
Ziniaré	0.25% Pirimiphos-methyl	26	26
Ziniaré	0.25% Pirimiphos-methyl	26	26
Ziniaré	0.25% Pirimiphos-methyl	25	25
Ziniaré	4% DDT	26	16
Ziniaré	4% DDT	22	10
Ziniaré	4% DDT	26	7
Ziniaré	4% DDT	27	9
