# Supplementary material
Source: Research Square preprint supplement (doi:10.21203/rs.3.rs-9683416/v1)
Supplement: Supplementary file 5 [file 1a78285503a8773243e45c78.xlsx]

## Sheet: Feuil1
Table S2. Raw mortality data from insecticide susceptibility tests of Anopheles coluzzii collected in the Vallée du Kou over five consecutive years
Year	Treatment	Total	Mortality 24h
2021	Control	26	0
2021	Control	25	0
2021	Control	25	1
2021	Control	25	0
2021	0.05% Deltamethrin	25	0
2021	0.05% Deltamethrin	26	0
2021	0.05% Deltamethrin	25	0
2021	0.05% Deltamethrin	25	0
2021	4% PBO + 0.05% Deltamethrin	25	0
2021	4% PBO + 0.05% Deltamethrin	26	0
2021	4% PBO + 0.05% Deltamethrin	26	0
2021	4% PBO + 0.05% Deltamethrin	25	0
2021	0.1% Bendiocarb	25	22
2021	0.1% Bendiocarb	26	26
2021	0.1% Bendiocarb	26	25
2021	0.1% Bendiocarb	25	25
2021	0.25% Pirimiphos-methyl	26	26
2021	0.25% Pirimiphos-methyl	25	25
2021	0.25% Pirimiphos-methyl	25	25
2021	0.25% Pirimiphos-methyl	25	25
2022	Control	25	0
2022	Control	26	0
2022	Control	25	0
2022	Control	26	0
2022	0.05% Deltamethrin	24	0
2022	0.05% Deltamethrin	26	0
2022	0.05% Deltamethrin	25	1
2022	0.05% Deltamethrin	26	0
2022	4% PBO + 0.05% Deltamethrin	25	4
2022	4% PBO + 0.05% Deltamethrin	26	14
2022	4% PBO + 0.05% Deltamethrin	25	7
2022	4% PBO + 0.05% Deltamethrin	25	10
2022	0.1% Bendiocarb	25	25
2022	0.1% Bendiocarb	25	25
2022	0.1% Bendiocarb	24	24
2022	0.1% Bendiocarb	26	26
2022	0.25% Pirimiphos-methyl	26	26
2022	0.25% Pirimiphos-methyl	24	24
2022	0.25% Pirimiphos-methyl	26	26
2022	0.25% Pirimiphos-methyl	25	25
2023	Control	25	0
2023	Control	25	0
2023	Control	25	0
2023	Control	25	0
2023	0.05% Deltamethrin	25	0
2023	0.05% Deltamethrin	25	0
2023	0.05% Deltamethrin	25	0
2023	0.05% Deltamethrin	25	0
2023	4% PBO + 0.05% Deltamethrin	25	6
2023	4% PBO + 0.05% Deltamethrin	26	10
2023	4% PBO + 0.05% Deltamethrin	25	9
2023	4% PBO + 0.05% Deltamethrin	26	7
2023	0.1% Bendiocarb	26	25
2023	0.1% Bendiocarb	24	24
2023	0.1% Bendiocarb	25	25
2023	0.1% Bendiocarb	25	24
2023	0.25% Pirimiphos-methyl	25	25
2023	0.25% Pirimiphos-methyl	25	25
2023	0.25% Pirimiphos-methyl	25	25
2023	0.25% Pirimiphos-methyl	25	25
2024	Control	26	0
2024	Control	26	0
2024	Control	25	0
2024	Control	25	0
2024	0.05% Deltamethrin	25	0
2024	0.05% Deltamethrin	26	0
2024	0.05% Deltamethrin	25	0
2024	0.05% Deltamethrin	25	0
2024	4% PBO + 0.05% Deltamethrin	25	5
2024	4% PBO + 0.05% Deltamethrin	25	8
2024	4% PBO + 0.05% Deltamethrin	25	7
2024	4% PBO + 0.05% Deltamethrin	25	10
2024	0.1% Bendiocarb	26	24
2024	0.1% Bendiocarb	25	25
2024	0.1% Bendiocarb	25	25
2024	0.1% Bendiocarb	26	24
2024	0.25% Pirimiphos-methyl	25	25
2024	0.25% Pirimiphos-methyl	24	24
2024	0.25% Pirimiphos-methyl	25	25
2024	0.25% Pirimiphos-methyl	26	26
2025	Control	25	0
2025	Control	25	0
2025	Control	25	0
2025	Control	25	0
2025	0.05% Deltamethrin	25	0
2025	0.05% Deltamethrin	25	0
2025	0.05% Deltamethrin	25	0
2025	0.05% Deltamethrin	25	0
2025	4% PBO + 0.05% Deltamethrin	26	13
2025	4% PBO + 0.05% Deltamethrin	25	14
2025	4% PBO + 0.05% Deltamethrin	25	9
2025	4% PBO + 0.05% Deltamethrin	25	18
2025	0.1% Bendiocarb	25	25
2025	0.1% Bendiocarb	25	25
2025	0.1% Bendiocarb	25	25
2025	0.1% Bendiocarb	25	25
2025	0.25% Pirimiphos-methyl	25	25
2025	0.25% Pirimiphos-methyl	25	25
2025	0.25% Pirimiphos-methyl	25	25
2025	0.25% Pirimiphos-methyl	25	25
