# Supplementary material
Source: Research Square preprint supplement (doi:10.21203/rs.3.rs-9683416/v1)
Supplement: Supplementary file 6 [file 22c1ec963138ce99fdc2a593.xlsx]

## Sheet: Feuil1
Table S3. Raw mortality data from insecticide susceptibility tests across six generations of a laboratory colony of Anopheles coluzzii.
Generation	Treatment	Total	Mortality 24h
F5	Control	26	0
F5	Control	25	0
F5	Control	26	0
F5	Control	25	0
F5	0.05% Deltamethrin	27	0
F5	0.05% Deltamethrin	25	0
F5	0.05% Deltamethrin	27	0
F5	0.05% Deltamethrin	25	0
F5	4% PBO + 0.05% Deltamethrin	25	8
F5	4% PBO + 0.05% Deltamethrin	27	13
F5	4% PBO + 0.05% Deltamethrin	26	9
F5	4% PBO + 0.05% Deltamethrin	26	15
F5	0.1% Bendiocarb	24	23
F5	0.1% Bendiocarb	26	22
F5	0.1% Bendiocarb	25	23
F5	0.1% Bendiocarb	25	21
F5	0.25% Pirimiphos-methyl	25	25
F5	0.25% Pirimiphos-methyl	25	25
F5	0.25% Pirimiphos-methyl	26	26
F5	0.25% Pirimiphos-methyl	27	27
F9	Control	26	0
F9	Control	25	0
F9	Control	26	0
F9	Control	25	0
F9	0.05% Deltamethrin	25	0
F9	0.05% Deltamethrin	25	0
F9	0.05% Deltamethrin	26	2
F9	0.05% Deltamethrin	25	0
F9	4% PBO + 0.05% Deltamethrin	25	8
F9	4% PBO + 0.05% Deltamethrin	27	16
F9	4% PBO + 0.05% Deltamethrin	26	9
F9	4% PBO + 0.05% Deltamethrin	26	11
F9	0.1% Bendiocarb	25	25
F9	0.1% Bendiocarb	24	24
F9	0.1% Bendiocarb	26	26
F9	0.1% Bendiocarb	26	26
F9	0.25% Pirimiphos-methyl	26	26
F9	0.25% Pirimiphos-methyl	26	26
F9	0.25% Pirimiphos-methyl	25	25
F9	0.25% Pirimiphos-methyl	24	24
F14	Control	25	0
F14	Control	26	0
F14	Control	26	0
F14	Control	27	0
F14	0.05% Deltamethrin	26	1
F14	0.05% Deltamethrin	26	2
F14	0.05% Deltamethrin	23	1
F14	0.05% Deltamethrin	23	0
F14	4% PBO + 0.05% Deltamethrin	26	19
F14	4% PBO + 0.05% Deltamethrin	25	17
F14	4% PBO + 0.05% Deltamethrin	25	18
F14	4% PBO + 0.05% Deltamethrin	26	18
F14	0.1% Bendiocarb	25	22
F14	0.1% Bendiocarb	26	25
F14	0.1% Bendiocarb	26	23
F14	0.1% Bendiocarb	25	25
F14	0.25% Pirimiphos-methyl	23	23
F14	0.25% Pirimiphos-methyl	26	26
F14	0.25% Pirimiphos-methyl	24	24
F14	0.25% Pirimiphos-methyl	26	26
F18	Control	25	0
F18	Control	25	0
F18	Control	25	0
F18	Control	25	0
F18	0.05% Deltamethrin	25	0
F18	0.05% Deltamethrin	25	0
F18	0.05% Deltamethrin	25	0
F18	0.05% Deltamethrin	25	0
F18	4% PBO + 0.05% Deltamethrin	24	13
F18	4% PBO + 0.05% Deltamethrin	25	19
F18	4% PBO + 0.05% Deltamethrin	25	21
F18	4% PBO + 0.05% Deltamethrin	26	15
F18	0.1% Bendiocarb	25	25
F18	0.1% Bendiocarb	25	25
F18	0.1% Bendiocarb	25	25
F18	0.1% Bendiocarb	25	24
F18	0.25% Pirimiphos-methyl	25	25
F18	0.25% Pirimiphos-methyl	26	26
F18	0.25% Pirimiphos-methyl	24	24
F18	0.25% Pirimiphos-methyl	25	25
F23	Control	25	0
F23	Control	25	0
F23	Control	25	0
F23	Control	25	0
F23	0.05% Deltamethrin	26	0
F23	0.05% Deltamethrin	25	0
F23	0.05% Deltamethrin	25	0
F23	0.05% Deltamethrin	25	0
F23	4% PBO + 0.05% Deltamethrin	25	13
F23	4% PBO + 0.05% Deltamethrin	23	14
F23	4% PBO + 0.05% Deltamethrin	25	14
F23	4% PBO + 0.05% Deltamethrin	25	15
F23	0.1% Bendiocarb	25	25
F23	0.1% Bendiocarb	26	26
F23	0.1% Bendiocarb	24	24
F23	0.1% Bendiocarb	25	25
F23	0.25% Pirimiphos-methyl	25	25
F23	0.25% Pirimiphos-methyl	25	25
F23	0.25% Pirimiphos-methyl	25	25
F23	0.25% Pirimiphos-methyl	25	25
F27	Control	27	0
F27	Control	25	1
F27	Control	25	0
F27	Control	26	0
F27	0.05% Deltamethrin	26	2
F27	0.05% Deltamethrin	26	5
F27	0.05% Deltamethrin	25	2
F27	0.05% Deltamethrin	26	3
F27	4% PBO + 0.05% Deltamethrin	26	15
F27	4% PBO + 0.05% Deltamethrin	27	10
F27	4% PBO + 0.05% Deltamethrin	25	12
F27	4% PBO + 0.05% Deltamethrin	27	16
F27	0.1% Bendiocarb	25	23
F27	0.1% Bendiocarb	25	21
F27	0.1% Bendiocarb	26	21
F27	0.1% Bendiocarb	26	23
F27	0.25% Pirimiphos-methyl	26	26
F27	0.25% Pirimiphos-methyl	26	26
F27	0.25% Pirimiphos-methyl	24	24
F27	0.25% Pirimiphos-methyl	25	25
