# Supplementary material
Source: Research Square preprint supplement (doi:10.21203/rs.3.rs-9683416/v1)
Supplement: Supplementary file 7 [file 3486e2618ece44da3d5d4080.xlsx]

## Sheet: Feuil1
Table S4. Raw L995F genotyping data in Anopheles coluzzii across four localities in Burkina Faso
Bama		Banfora		Nanoro		Ziniaré
ID	Genotype	ID	Genotype	ID	Genotype	ID	Genotype
1	RR	1	SS	1	RS	1	SS
2	RR	2	RR	2	RS	2	SS
3	SS	3	SS	3	SS	3	SS
4	RR	4	RR	4	SS	4	SS
5	RS	5	RR	5	RR	5	SS
6	SS	6	RS	6	RS	6	SS
7	RR	7	RS	7	SS	7	RS
8	RS	8	RS	8	RS	8	RR
9	RS	9	RR	9	RS	9	SS
10	SS	10	RS	10	SS	10	SS
11	SS	11	SS	11	RS	11	SS
12	SS	12	RR	12	SS	12	SS
13	SS	13	SS	13	RS	13	RR
14	SS	14	SS	14	RR	14	SS
15	SS	15	SS	15	SS	15	RS
16	SS	16	RR	16	SS	16	RS
17	SS	17	RS	17	SS	17	RS
18	RR	18	RR	18	RR	18	RS
19	RS	19	RS	19	RR	19	RS
20	RS	20	RS	20	SS	20	RS
21	SS	21	RS	21	SS	21	SS
22	RR	22	RS	22	SS	22	SS
23	RS	23	RS	23	RS	23	RS
24	RS	24	RR	24	RR	24	SS
25	RS	25	RR	25	SS	25	RS
26	SS	26	SS	26	RS	26	RS
27	RR	27	SS	27	SS	27	RR
28	RR	28	RS	28	RR	28	RS
29	RS	29	RS	29	RS	29	SS
30	SS	30	RS	30	RS	30	RS
31	RS	31	RR	31	RS	31	SS
32	SS	32	RS	32	SS	32	RS
33	SS	33	RS	33	SS	33	RS
34	SS	34	RR	34	RS	34	RS
35	SS	35	RS	35	RS	35	SS
36	SS	36	RS	36	RS	36	SS
37	RS	37	RS	37	SS	37	SS
38	RR	38	RS	38	SS	38	SS
39	RS	39	SS	39	RS	39	SS
40	RR	40	RR	40	RR	40	SS
41	SS	41	SS	41	RS	41	RS
42	RR	42	SS	42	SS	42	RS
43	RS	43	RS	43	SS	43	SS
44	SS	44	RR	44	RS
45	SS	45	RS	45	SS
46	SS	46	RS	46	RR
47	SS	47	RS	47	SS
48	RS	48	SS	48	RS
49	RR	49	RS	49	SS
50	RR	50	RS
51	RR	51	SS
		52	RS
		53	RS
		54	RS
		55	RS
		56	RS
Legend: S = susceptible allele L995S, R = resistant allele L995F
